# Supplementary material for: Characterization of brain tumor initiating cells isolated from an animal model of CNS primitive neuroectodermal tumors
Source: PubMed Central journal article supplement (PMC5862611; doi:10.18632/oncotarget.24460), 2018-02-09
Supplement: oncotarget-09-13733-s001.pdf [file oncotarget-09-13733-s001.pdf]

## Characterization of brain tumor initiating cells isolated from an animal model of CNS primitive neuroectodermal tumors

### SUPPLEMENTARY MATERIALS

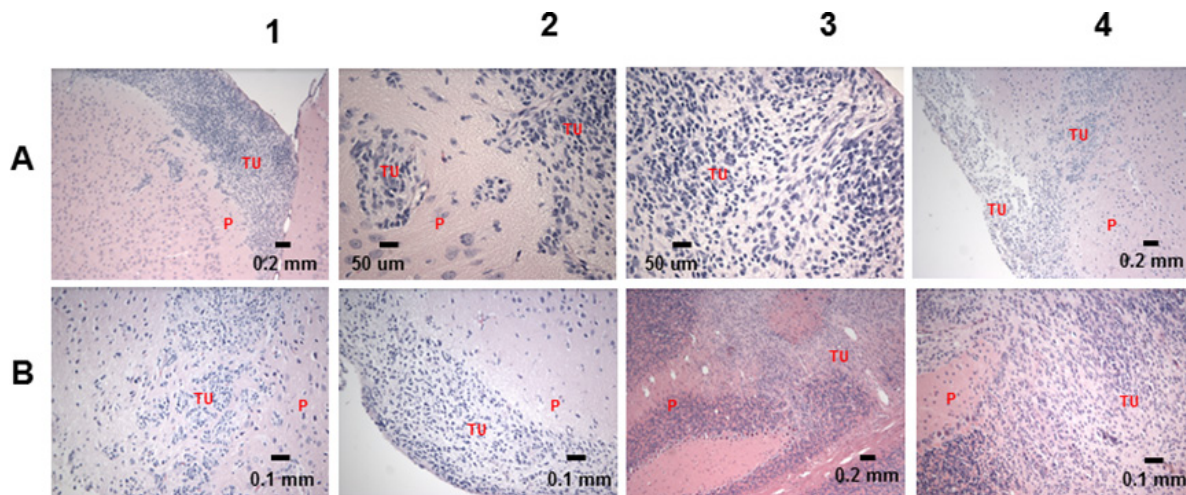

**Supplementary Figure 1: Morphological analysis of the TCL derived tumors in motor cortex and cerebellum.** (A1) HE 10x (motor cortex: LCAS-RTL(138) 7 weeks post-injection, (A2) HE 40x (motor cortex: LCAS-RTL(138) 7 weeks post-injection (invasion area)), (A3) HE 40x (motor cortex: LCAS-RTL(138) 7 weeks post-injection (surface area)), (A4) HE 10x (motor cortex: LC26-RTL(170) 7 weeks post-injection - superficial growth of a tumor characterized by undifferentiated small round blue cells. Foci of perivascular invasion of tumor cells is observed within the adjacent brain parenchyma; (B1) HE 20x (motor cortex: LC26-RTL(170) 7 weeks post-injection (invasion area)), (B2) HE 20x (motor cortex: LC26-RTL(170) 7 weeks post-injection (surface area)), (B3) HE 10x (cerebellum: LC26-RTL(170) 7 weeks post-injection, (B4) HE 20x (cerebellum: LC26-RTL(170) 7 weeks post-injection - a tumor mass grows superficially in motor cortex, extensive invades the adjacent, brain parenchyma and disseminates throughout the ventricular system reaching the cerebellum and extensively infiltrating it.

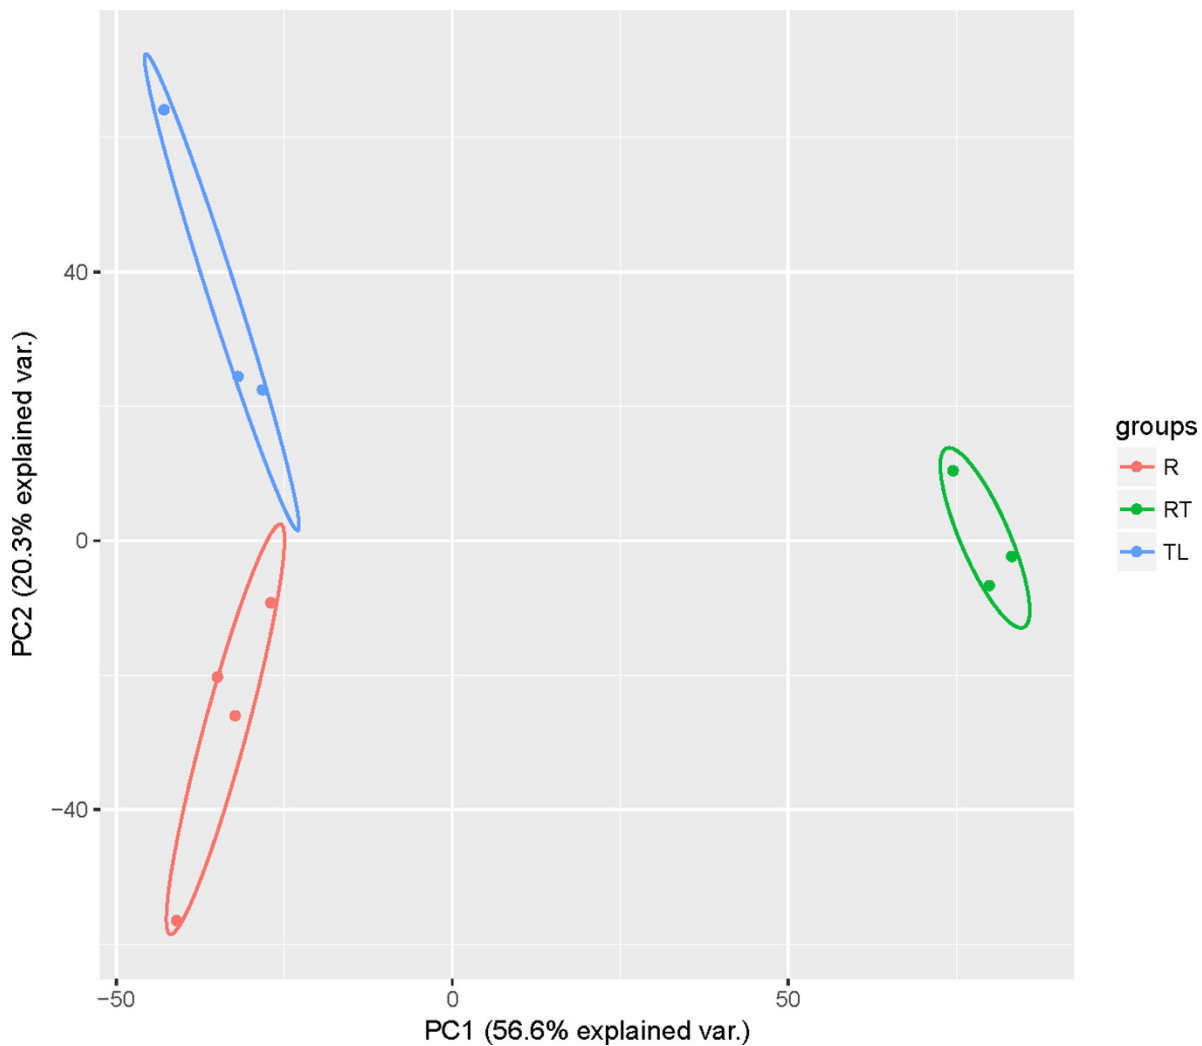

**Supplementary Figure 2: RNA-seq PCA.** Score plot of the first principal component (PC1) versus second principal component PC2 from PCA of the 1000 most varied genes. These two components describe around 77% of the total variation. PC1 explains 56.6% of the total variation and demonstrates a grouping of TL and R samples, separated with RT. PC2 distinguishes the three TL samples with the three R samples.

Supplementary Table 1: RT-PCR primer sequences

| Gene      | Forward primer (5' → 3') | Reverse primer (5' → 3') |
|-----------|--------------------------|--------------------------|
| CD44      | CTGCCGCTTTGCAGGTGTA      | CATTGTGGGCAAGGTGCTATT    |
| cMYC      | CCTACCCTCTCAACGACAGC     | TTGTTCTCCTCAGAGTCGC      |
| Vimentin  | AGTCCACTGAGTACCGGAGAC    | CATTTACGCATCTGGCGTTC     |
| Sox2      | GCCGAGTGGAACTTTTGTCTG    | GGCAGCGTGACTIONTATCCTTCT |
| BLBP      | GTGGGAAATGTGACCAAACC     | CTTTGCCATCCCATTCTGT      |
| Nestin    | CAGGAGAAACAGGGCCTACA     | TGGGAGCAAAGATCCAAGAC     |
| OCT3/4    | GGAAGGTATTCAGCCAAACG     | CTCCAGGTTGCCTCTCACTC     |
| OTX2      | CATGCAGAGGTCTATCCCAT     | AAGCTGGGGACTGATTGAGAT    |
| NR2F1     | AAAGCCATCGTGCTGTTCAC     | TGCAGGCTCTCGATGTGG       |
| Prame     | CAGGACTTCTGGACTGTATGGT   | CTACGAGCACCTCTACTGGAA    |
| HEY1      | GTTCGGCTCTAGGTTCCATGT    | CGTCGGCGCTTCTCAATTATTC   |
| Elongin C | CATCAGGCACGATAAAAGCCA    | GCTGTTAGTGTAGCGAACCTTG   |
| ANXA1     | CTAAGCGAAACAATGCACAGC    | CCTCCTCAAGGTGACCTGTAA    |
| ANXA2     | CTCTACACCCCCAAGTGCAT     | TCAGTGCTGATGCAAGTTCC     |
| Humanin   | TGACACATGTTTAACGGCCG     | AGGGRCTTCTCGTCTTGCTG     |
| EPHA3     | ACTCTACGAGACTGCAATAGCA   | TCCCCAAGARCCATTGAGTG     |
| NRP1      | ACGTGGAAGTCTTCGATGGAG    | CACCATGTGTTTCGTAGTCAGA   |
| KDM4c     | CGAGGTGGAAAGTCCTCTGAA    | GGGCTCCTTTAGACTCCATGTAT  |
| KDM5b     | AGTGGGCTCACATATCAGAGG    | CAAACACCTTAGGCTGTCTCC    |
| KDM5c     | TCAGTGACAGTAAACGGCACC    | ACACCGGCATCACATTTAGGT    |
| HDAC      | AGTAGAGAGGCATCGCAGAGA    | GGAGTGTCTTTTCGTTGCTGAT   |
| MAX       | GGAGAGCGACGCTGACAAAC     | AGGTGTGGCATTCTGCATC      |
| MINA53    | CCACATACTATGGGTCCCTGT    | TGAAACTGAATCGTTGCCCTT    |
| EMP1      | CCACTTCTGGGTCATGCACT     | TTGCCAGAACTTGTACCGCT     |
| EMP3      | CCTGAATCTCTGGTACGACTGC   | GCCATTCTCGCTGACATTACTG   |
| TGFB1     | CTTCGCCCCTAGCAACGAG      | TGAGGGTCATGCCGTGTTTC     |
| ANXA2     | CTCTACACCCCCAAGTGCAT     | TCAGTGCTGATGCAAGTTCC     |
| GTF2H1    | GACCTTGTGTGAGTCAAGTGA    | CCTGCTTATGATTGGATGTGGAA  |
| ENO1      | TGATCGAGATGGATGGAACA     | GCAGGATGACTTCAGAGTTGC    |
| CTSC      | TTGTTTATGCAGCTGGGAAC     | TCACCAGGACTCCTTTGCAT     |
| LOX       | CGGCGGAGGAAAACGTGCT      | TCGGCTGGGTAAGAAATCTGA    |
| MALT1     | ACCGCCAATATTGTGTTTGG     | TGCAACTTCATCCAGTAACACA   |
| TRX1      | GTGAAGCAGATCGAGAGCAAG    | CGTGGCTGAGAAGTCAACTACTA  |
| P53       | GCTTCCCTGGATTGGCAGC      | GAGCTTCATCTGGACCTGGG     |
| TRIM22    | CTGTCTGTGRGRGACAGACCAG   | TGTGGGCTCATCTTGACCTCT    |
| DKK3      | AGGACACGCAGCACAAATTG     | CCAGTCTGGTTGTTGGTTATCTT  |
| PEA15     | GGAGAGCCACAACAAGCTG      | CCATAGTGAGTAGGTCAGGACG   |
| CAV1      | ACCCACTCTTTGAAGCTGTTG    | GAACCTGAAATTGGCACCAGG    |
| ACAD11    | TTGGATTCCCCGTTCCCAAG     | AAATCACGGAAGATTTCGACCC   |
| ACSL3     | ATGGAAAACCAACCTCATAGCAA  | GCCATCCCAGTTATACCAGCAA   |
| PPAT      | AATTGTCAGCCCTTCGTTGTT    | CCTTAATCGAGCAGCATTACCA   |
| GART      | GTGTCTGTGTTTCACTGATGCC   | GCTGGACAATAGGCTCCCATT    |
| ALDOA     | CAAGAAGGACGGAGCTGACT     | TTCAAGTCATGGTCCCCATC     |
| GLS       | TCTACAGGATTGCGAACGTCT    | CTTTGTCTAGCATGACACCATCT  |

**Supplementary Table 2: Copy number variations (CNV) and the expression level of the genes resided in the areas affected by CNVs (LC26-RTL(170))**

See Supplementary File 1

**Supplementary Table 3: Copy number variations (CNV) and the expression level of the genes resided in the areas affected by CNVs (LC25-RTL(293))**

See Supplementary File 2

**Supplementary Table 4: Copy number variations (CNV) and the expression level of the genes resided in the areas affected by CNVs (LCAS-RTL(138))**

See Supplementary File 3

**Supplementary Table 5: Single nucleotide polymorphism (SNP): LC25-RTL(293)**

See Supplementary File 4

**Supplementary Table 6: Single nucleotide polymorphism (SNP): LC26-RTL(170)**

See Supplementary File 5

**Supplementary Table 7: Single nucleotide polymorphism (SNP): LCAS-RTL(138)**

See Supplementary File 6
